# Supplementary material
Source: publisher site journal article supplement (https://www.dovepress.com/get_supplementary_file.php?f=429394.docx)
Supplement: Supplementary file 1 [file get_supplementary_file.php]

**Cost-Effectiveness Analysis of Pembrolizumab Plus Chemotherapy in Squamous Non–Small-Cell Lung Cancer in China**

Xin Zhang1,*,Huixian Zhang1,*,Lan-fang Li1, Lei Feng1, Qiao Liu2

1. Department of Clinical Pharmacy, Affiliated Hospital of Jining Medical University, Jining Medical University, Jining, Shandong, PR China.
2. Department of Pharmacy, The Second Xiangya Hospital of Central South University, Central South University, Changsha, Hunan, PR China.

*These authors made equal contributions to the work.

**Table S1. First-line therapies used in the model**

| **Second- or Later-line therapy** | | Subsequent anticancer therapy**b** | | | |
| --- | --- | --- | --- | --- | --- |
| **Regimen** | **Dosage and Schedulea** | **Regimen** | | **Dosage and Schedule** | **Proportion** |
| Sotorasib | 960 mg, daily | Chemotherapy | Pemetrexedc | 500 mg/m2, every 3 weeks | 21.1% |
| KRASG12C inhibitor | Sotorasib | 960 mg, daily | 3.5% |
| Immunotherapy | Nivolumab | 3mg/kg, every 2 weeks | 9.4% |
| Other | Anlotinib | 168mg, every 3 weeks | 14.6% |
| Docetaxel | 75 mg/m², every 3 weeks | Chemotherapy | The same as above | | 12.1% |
| KRASG12C inhibitor | 33.9% |
| Immunotherapy | 5.7% |
| Other | 10.3% |

aFollowed the CodeBreaK 200 trial.

bDue to fact that the specific drugs were not disclosed with the results of the phase III CodeBreaK 200 study, subsequent anticancer therapies were modeled based on the preferred therapy recommended by the latest Guidelines of Chinese society of clinical oncology for non-small cell lung cancer (2022 edition).

cPemetrexed was selected as a subsequent chemotherapy drug for both arms, because the vast majority of participants in the CodeBreaK 200 trial were non-squamous histological subtypes (98.9% in the sotorasib arm and 94.8% in the docetaxel arm, respectively).

**Table S2. Recommended Pretreatment Medications for paclitaxel**

| **Pretreatment medications1** | **Dosage** | **Schedule** | **Source** |
| --- | --- | --- | --- |
| Dexamethasone | 20mg | 30-60 minutes prior to each paclitaxel infusion | KEYNOTE-407 Study1 |
| Diphenhydramine | 50mg | 30-60 minutes prior to each paclitaxel infusion |
| Cimetidine | 300mg | 30-60 minutes prior to each paclitaxel infusion |

**Table S3. Drug prices for subsequent anticancer therapies**

| **Drugs** | **Price ($) /mg** | **Source** |
| --- | --- | --- |
| Pembrolizumab | 26.64 | National Health Industry Data Platform2 |
| Paclitaxel | 0.25 |
| Nabpaclitaxel | 0.22 |
| Carboplatin | 0.08 |
| Atezolizumab | 4.06 |
| Afatinib | 0.56 |
| Docetaxel | 1.81 |
| Ipilimumab | 83.26 |
| Nivolumab | 13.75 |
| Gemcitabine | 0.03 |
| Bevacizumab | 1.68 |
| Anlotinib | 3.79 |
| Ramucirumab | 12.49 | Pharmacy Checker 3 |

**Table S4. Subsequent anticancer therapies used in the model**

| **Regimena** | | **Dosage** | **Schedule** | **Costs/cycleb ($)** | **Proportion (%)** | | **Source** |
| --- | --- | --- | --- | --- | --- | --- | --- |
| **Pembro arm** | **Placebo arm** |
| **First subsequent therapy** | | | | | | | KEYNOTE-407 Study1;  CSCO Guidelines4 |
| Pembrolizumab in study crossover | | 200mg/cycle | consecutive cycles | 5,327.90 | 0.00% | 41.80% |
| Pembrolizumab | | 200mg/cycle | consecutive cycles | 5,327.90 | 2.50% | 1.40% |
| Other anti-PD-(L)1 antibodies with/without thyrosine kinase inhibitor | Atezolizumab | 1200mg/cycle | consecutive cycles | 4,876.53 | 1.80% | 5.40% |
| Atezolizumab+afatinib | Atezolizumab, 1200mg/cycle; afatinib, 840mg/cycle | consecutive cycles | 5,344.85 |
| Platinum doublet with/without third agent | Carboplatin +Paclitaxel | Carboplatin, 900mg/cycle; Paclitaxel, 344mg/cycle | 4-6 cycles | 155.48 | 14.00% | 5.00% |
| Carboplatin +Paclitaxel+Gemcitabine | Carboplatin, 900mg/cycle; Paclitaxel, 344mg/cycle; Gemcitabine,1935mg/cycle | 4-6 cycles | 218.17 |
| Platinum | Carboplatin | 900mg/cycle | 4-6 cycles | 86.43 | 1.40% | 0.00% |
| Nonplatinum single-agent chemotherapy | Docetaxel | 116.1 mg/cycle | 4-6 cycles | 209.90 | 18.00% | 6.80% |
| Nonplatinum chemotherapy plus VEGFR2 antagonist | Docetaxel +Ramucirumab | Docetaxel, 116.1 mg/cycle;  Ramucirumab, 975mg/cycle | consecutive cycles | 12,386.34 | 4.00% | 2.00% |
| Othersc | | | consecutive cycles | 4,565.66 | 0.00% | 1.00% |
| **Second subsequent therapy** | | | | | | |
| Pembrolizumab plus othersd | Pembrolizumab+Carboplatin+Paclitaxel | Pembrolizumab, 200mg/cycle;  Carboplatin, 900mg/cycle; Paclitaxel, 344mg/cycle | consecutive cycles | 5,483.38 | 0.40% | 0.40% |
| Pembrolizumab | Pembrolizumab | 200mg/cycle | consecutive cycles | 5,327.90 | 0.40% | 1.10% |
| Other anti-PD-(L)1 antibodies with/without thyrosine kinase inhibitor | Atezolizumab | 1200mg/cycle | consecutive cycles | 4,876.53 | 0.40% | 0.00% |
| Atezolizumab+afatinib | Atezolizumab,1200mg/cycle; afatinib, 840mg/cycle | consecutive cycles | 5,344.85 |
| Other immunotherapies | Ipilimumab | 32.5mg/cycle | consecutive cycles | 0.0 | 0.00% | 0.40% |
| Other anti-PD-(L)1 antibodies with/without single-agent chemotherapy | Nivolumab | 292.5mg/cycle | consecutive cycles | 4,022.58 | 0.40% | 0.00% |
| Nivolumab+Gemcitabine | Nivolumab, 292.5mg/cycle; Gemcitabine,1935mg/cycle | 4-6 cycles | 4,085.28 |
| Platinum doublet with/without third agent | Carboplatin +Paclitaxel | Carboplatin, 900mg/cycle; Paclitaxel, 344mg/cycle | 4-6 cycles | 155.48 | 2.90% | 6.80% |
| Carboplatin +Paclitaxel+Gemcitabine | Carboplatin, 900mg/cycle; Paclitaxel, 344mg/cycle; Gemcitabine ,1935mg/cycle | 4-6 cycles | 218.17 |
| Platinum | Carboplatin | 900mg/cycle | 4-6 cycles | 0.0 | 0.00% | 0.7% |
| Nonplatinum single-agent chemotherapy | Docetaxel | 116.1 mg/cycle | 4-6 cycles | 209.90 | 15.10% | 11.10% |
| Nonplatinum chemotherapy plus VEGFR2 antagnoist | Docetaxel +Ramucirumab | Docetaxel, 116.1 mg/cycle;  Ramucirumab, 975mg/cycle | consecutive cycles | 12,386.34 | 1.10% | 1.40% |
| Thyrosine kinase inhibitor | Anlotinib | 168mg/cycle | consecutive cycles | 636.92 | 0.40% | 0.00% |
| Othersc | | | consecutive cycles | 1,376.16 | 0.00% | 0.40% |
| **Third subsequent therapy** | | | | | | |
| Pembrolizumab plus chemotherapy | Pembrolizumab+  Carboplatin+Paclitaxel | Pembrolizumab,200mg/cycle;  Carboplatin, 900mg/cycle; Paclitaxel, 344mg/cycle | consecutive cycles | 5,483.38 | 0.00% | 0.40% |
| Other anti-PD-(L)1 antibodies | Atezolizumab | 1200mg/cycle | consecutive cycles | 4,876.53 | 1.40% | 0.70% |
| Platinum doublet with/without third agent | Carboplatin +Paclitaxel | Carboplatin, 900mg/cycle; Paclitaxel, 344mg/cycle | 4-6 cycles | 155.48 | 0.70% | 1.40% |
| Carboplatin +Paclitaxel+Gemcitabine | Carboplatin, 900mg/cycle; Paclitaxel, 344mg/cycle; Gemcitabine ,1935mg/cycle | 4-6 cycles | 218.17 |
| Platinum | Carboplatin | 900mg/cycle | 4-6 cycles | 86.43 | 0.40% | 0.00% |
| Nonplatinum single-agent chemotherapy | Gemcitabine | 1935mg/cycle | 4-6 cycles | 62.69 | 2.20% | 4.70% |
| Nonplatinum agent plus VEGF inhibitor | Paclitaxel+Bevacizumab | Paclitaxel, 344mg/cycle; Bevacizumab, 975mg/cycle | consecutive cycles | 1,704.17 | 0.40% | 0.00% |
| Thyrosine kinase inhibitor | Anlotinib | 168mg/cycle | consecutive cycles | 636.92 | 0.70% | 0.40% |
| **Fourth subsequent therapy** | | | | | | |
| Other anti-PD-(L)1 antibodies | Nivolumab | 292.5mg/cycle | consecutive cycles | 4,022.58 | 0.40% | 0.70% |
| Platinum doublet with/without third agent | Carboplatin +Paclitaxel | Carboplatin, 900mg/cycle; Paclitaxel, 344mg/cycle | 4-6 cycles | 155.48 | 0.70% | 0.70% |
| Carboplatin +Paclitaxel+Gemcitabine | Carboplatin, 900mg/cycle; Paclitaxel, 344mg/cycle; Gemcitabine ,1935mg/cycle | 4-6 cycles | 218.17 |
| Nonplatinum single-agent chemotherapy | Docetaxel | 116.1 mg/cycle | 4-6 cycles | 209.90 | 1.10% | 0.70% |
| Nonplatinum chemotherapy plus VEGFR2 antagnoist | Docetaxel +Ramucirumab | Docetaxel ,116.1 mg/cycle; Ramucirumab ,975mg/cycle | consecutive cycles | 12,386.34 | 0.00% | 0.40% |
| Thyrosine kinase inhibitor | Anlotinib | 168mg/cycle | consecutive cycles | 636.92 | 0.40% | 0.00% |
| Othersc | | | consecutive cycles | 855.95 | 0.40% | 0.00% |
| **Fifth subsequent therapy** | | | | | | |
| Nonplatinum single-agent chemotherapy | Gemcitabine | 1935mg/cycle | 4-6 cycles | 62.69 | 1.10% | 0.70% |
| Nonplatinum chemotherapy plus VEGFR2 antagnoist | Docetaxel +Ramucirumab | Docetaxel,116.1 mg/cycle;  Ramucirumab, 975mg/cycle | consecutive cycles | 12,386.34 | 0.40% | 0.00% |
| Thyrosine kinase inhibitor | Anlotinib | 168mg/cycle | consecutive cycles | 636.92 | 0.40% | 0.70% |
| **Sixth subsequent therapy** | | | | | | |
| Other anti-PD-(L)1 antibodies | Nivolumab | 292.5mg/cycle | consecutive cycles | 4,022.60 | 0.00% | 0.40% |
| Nonplatinum single-agent chemotherapy | Gemcitabine | 1935mg/cycle | 4-6 cycles | 62.69 | 0.40% | 0.40% |

Abbreviations: PD-(L)1, programmed death receptor-1/programmed death protein ligand-1**;** VEGFR2, vascular endothelial growth factor receptor 2; VEGF, vascular endothelial growth factor.

aFor certain subsequent anticancer therapy regimens where specific drugs were not specified, the modeling was based on the recommended treatment outlined in the latest edition (2022) of the Guidelines of the Chinese Society of Clinical Oncology (CSCO) for non-small cell lung cancer.

bThe cost/cycle of each subsequent regimens was calculated by multiplying the latest bid-winning price retrieved from the National Health Industry Data Platform by the dosage administered every 3-week cycle. The dosage and schedule of subsequent anticancer drugs followed the CSCO guidelines for NSCLC (Version 2022). Moreover, to calculate patient characteristics-specific dosage, a average body surface area of 1.72m2 and an average body weight of 65kg were assumed in the model.

cThe cost of “others” was calculated as the frequency-weighted average of the costs of other drugs.

dPembrolizumab plus other was modeled as pembrolizumab plus chemotherapy based on local oncologists’ opinion.

**Table S5. AIC and BIC statistics for parametric survival models.**

| **Parametric survival model** | | | | **Exponential** | **Weibull** | **Log-normal** | **Log-logistic** | **Gompertz** |
| --- | --- | --- | --- | --- | --- | --- | --- | --- |
| **Entire trial population** | **OS** | **Placebo+Chemo** | **AIC** | -153 | -165 | -232 | -240 | -202 |
| **BIC** | -149 | -160 | -227 | -234 | -196 |
| **Pembro+Chemo** | **AIC** | -125 | -130 | -168 | -173 | -172 |
| **BIC** | -122 | -125 | -163 | -168 | -165 |
| **PFS** | **Placebo+Chemo** | **AIC** | -201 | -147 | -181 | -199 | -173 |
| **BIC** | -145 | -141 | -175 | -193 | -165 |
| **Pembro+Chemo** | **AIC** | -113 | -132 | -171 | -180 | -165 |
| **BIC** | -110 | -126 | -165 | -175 | -171 |
| **PD-L1 TPS≥50%** | **OS** | **Placebo+Chemo** | **AIC** | -128 | -176 | -165 | -162 | -147 |
| **BIC** | -125 | -171 | -159 | -157 | -140 |
| **Pembro+Chemo** | **AIC** | -141 | -172 | -203 | -201 | -196 |
| **BIC** | -137 | -166 | -197 | -196 | -189 |
| **PFS** | **Placebo+Chemo** | **AIC** | -143 | -142 | -175 | -191 | -163 |
| **BIC** | -140 | -137 | -170 | -185 | -155 |
| **Pembro+Chemo** | **AIC** | -93 | -112 | -140 | -143 | -126 |
| **BIC** | -90 | -107 | -135 | -138 | -119 |
| **PD-L1 TPS 1%-49%** | **OS** | **Placebo+Chemo** | **AIC** | -158 | -160 | -193 | -199 | -158 |
| **BIC** | -155 | -155 | -188 | -194 | -151 |
| **Pembro+Chemo** | **AIC** | -166 | -172 | -214 | -217 | -207 |
| **BIC** | -162 | -167 | -209 | -212 | -200 |
| **PFS** | **Placebo+Chemo** | **AIC** | -113 | -111 | -133 | -145 | -118 |
| **BIC** | -110 | -106 | -128 | -140 | -111 |
| **Pembro+Chemo** | **AIC** | -88 | -112 | -138 | -141 | -125 |
| **BIC** | -85 | -106 | -133 | -136 | -118 |
| **PD-L1 TPS ＜1%** | **OS** | **Placebo+Chemo** | **AIC** | -127 | -126 | -160 | -162 | -147 |
| **BIC** | -123 | -120 | -154 | -157 | -140 |
| **Pembro+Chemo** | **AIC** | -142 | -142 | -177 | -188 | -167 |
| **BIC** | -139 | -137 | -172 | -183 | -161 |
| **PFS** | **Placebo+Chemo** | **AIC** | -117 | -115 | -140 | -152 | -150 |
| **BIC** | -113 | -110 | -135 | -147 | -143 |
| **Pembro+Chemo** | **AIC** | -117 | -116 | -146 | -156 | -134 |
| **BIC** | -113 | -111 | -141 | -151 | -126 |

Abbreviations: AIC, Akaike information criterion; BIC, Bayesian information criterion; OS, overall survival; PFS, progression-free survival; PD-1, programmed death receptor-1; TPS, tumor proportion score; Pembro+Chemo pembrolizumab plus chemotherapy; Placebo+Chemo, placebo plus chemotherapy.

**Table S6. Derivation of AEs-related utility decrements**

| **AEs** | **Disutilities** | | **Duration (Days)** | | **Disutilities Decrement** |
| --- | --- | --- | --- | --- | --- |
| **Value** | **Source** | **Value** | **Source** |
| Anemia | 0.08973 | ICER5 | 42.0 | Delanoy N, et al6 | 0.01033 |
| Alopecia | 0.04495 | 270.0 | Antoury L,et al7 | 0.03325 |
| Neutropenia | 0.08973 | 16.8 | Delanoy N, et al6 | 0.00413 |
| Nausea | 0.04802 | 3.5 | Msaouel P, et al8 | 0.00046 |
| Diarrhea | 0.04680 | 14.0 | Borghaei H, et al9 | 0.00180 |
| Thrombocytopenia | 0.08973 | 30.8 | Delanoy N, et al6 | 0.00757 |
| Decreased appetite | 0.07346 | 14.0 | Borghaei H, et al9 | 0.00282 |
| Arthralgia | 0.06900 | 4.0 | Msaouel P, et al8 | 0.00076 |
| Constipation | 0.04600 | 14.0 | Borghaei H, et al9 | 0.00176 |
| Fatigue | 0.07346 | 5.0 | Msaouel P, et al8 | 0.00101 |
| Asthenia | 0.07346 | 5.0 | Msaouel P, et al8 | 0.00101 |
| Peripheral neuropathy | 0.06900 | 63.0 | Diamanti L,et al10 | 0.01191 |
| Rash | 0.03248 | 56.7 | Borghaei H, et al9 | 0.00505 |
| Pruritus | 0.03248 | 7.0 | Msaouel P, et al8 | 0.00062 |
| Vomiting | 0.04802 | 3.5 | Msaouel P, et al8 | 0.00046 |
| Cough | 0.04600 | 3.0 | Msaouel P, et al8 | 0.00038 |
| Pyrexia | 0.04680 | 3.0 | Msaouel P, et al8 | 0.00038 |
| Dyspnea | 0.05000 | 4.0 | Msaouel P, et al8 | 0.00055 |
| Hypothyroidism | 0.04600 | 63.0 | Ye qiang11 | 0.00794 |
| Pneumonitis | 0.07346 | 56.0 | Ma liyun, et al12 | 0.01127 |
| Hyperthyroidism | 0.04600 | 63.0 | Ye qiang11 | 0.00794 |
| Colitis | 0.04680 | 126.0 | Soularue E, et al13 | 0.01616 |
| Hepatitis | 0.04680 | 67.2 | Horn L, et al14 | 0.00862 |
| Severe skin reactions | 0.03248 | 60.0 | Martins F, et al15 | 0.00534 |
| Hypophysitis | 0.04600 | 42.0 | Martins F, et al15 | 0.00529 |
| Thyroiditis | 0.04600 | 63.0 | Ye qiang11 | 0.00794 |
| Nephritis | 0.04680 | 55.3 | Brahmer J, et al16 | 0.00709 |
| Vasculitis | 0.04600 | 56.0 | Qiu xuejia, et al17 | 0.00706 |
| Infusion reactions | 0.05520 | Assumption: average of other AEs’ disutility | 0.7 | Expert opinion | 0.00011 |

Abbreviations: AE, adverse events; ICER, incremental cost-effectiveness ratio.

**Table S7. Calculation of AE-related costs**

| **AEsa** | **Medication** | | **Examination** | | **Hospitalization** | | **Cost per event ($)** | **Source** |
| --- | --- | --- | --- | --- | --- | --- | --- | --- |
| **Drugs** | **Cost ($)** | **Items** | **Cost ($)** | **Duration** | **Cost ($)** |
| Anemia | Cytokines | 3.69 | blood routine examination | 8.47 | 5 | 37.17 | 49.34 | Consensus18 |
| Alopeciab | / | / | / | / | / | / | / | Local oncologists |
| Neutropenia | Leukocyte promoting drugs | 32.97 | blood routine examination | 8.47 | 7 | 52.04 | 93.48 | Consensus19 |
| Nausea | antiemetic | 13.13 | electrolyte | 4.31 | 5 | 37.17 | 54.62 | Consensus20 |
| Diarrhea | Antidiarrheal medicine | 0.62 | stool routine examination, electrolyte | 7.28 | 5 | 37.17 | 45.07 | Local oncologists |
| Thrombocytopenia | Platelet promoting drugs | 205.62 | blood routine examination | 8.47 | 7 | 52.04 | 266.13 | Consensus21 |
| Decreased appetite | lutin | 1.16 | electrolyte | 4.31 | 5 | 37.17 | 42.64 | Consensus22 |
| Arthralgia | NSAIDs | 2.38 | Whole biochemical analysis | 72.55 | 5 | 37.17 | 112.10 | Local oncologists |
| Constipation | cathartics | 5.23 | stool routine examination | 44.60 | 3 | 22.30 | 72.18 | Consensus23 |
| Fatigueb | / | / | / | / | / | / | / | Local oncologists |
| Asthenia | Blood tonics | 49.06 | blood routine examination | 5.65 | 7 | 52.04 | 106.75 | Local oncologists |
| Peripheral neuropathyc | Endogenous coenzymes | 1.26 | / | / | 7 | 52.04 | 53.30 | Consensus 24 |
| Rash | Skin antipruritic medication,Antiallergic drugs | 4.94 | blood routine examination | 5.65 | 5 | 37.17 | 47.76 | Local oncologists |
| Pruritusc | Skin antipruritic medication | 14.72 | / | / | 7 | 52.04 | 66.76 | Consensus25 |
| Vomiting | antiemetic | 13.13 | electrolyte | 4.31 | 5 | 37.17 | 54.62 | Consensus20 |
| Cough | cough medicine | 3.33 | blood routine examination,chest CT | 121.62 | 5 | 37.17 | 162.12 | consensus26 |
| Pyrexia | NSAIDs | 0.36 | blood routine examination,CRP | 13.38 | 10 | 74.34 | 88.08 | local oncologists |
| Dyspnea | Glucocorticoids | 35.91 | blood routine examination,chest CT | 121.62 | 7 | 52.04 | 209.57 | local oncologists |
| Hypothyroidism | Thyroid hormone drugs | 3.69 | Thyroid Function Tests | 44.60 | 7 | 52.04 | 100.33 | consensus27 |
| Pneumonitis | Antibiotics，cough medicine | 56.14 | chest CT | 115.97 | 10 | 74.33 | 246.44 | consensus28 |
| Hyperthyroidism | antithyroid drugs | 4.58 | thyroid function test | 29.73 | 7 | 52.04 | 86.35 | consensus27 |
| Infusion reactionsc | hormone | 1.78 | / | / | 7 | 52.04 | 53.82 | local oncologists |
| Colitis | Digestive System Drugs | 42.82 | colonoscopy | 89.20 | 7 | 52.04 | 184.06 | consensus29 |
| Hepatitis | Antihepatitis virus drugs | 3.17 | Liver and gallbladder ultrasound | 41.63 | 10 | 74.34 | 119.13 | local oncologists |
| Severe skin reactionsc | immunosuppressive drugs | 18.72 | / | / | 7 | 52.04 | 70.76 | local oncologists |
| Hypophysitis | hormone | 0.88 | Thyroid Function Tests，Pituitary MRI plain scan | 190.30 | 10 | 74.34 | 265.52 | consensus27 |
| Thyroiditis | Hormone，Thyroid hormone drugs | 4.58 | Thyroid Function Tests | 29.73 | 7 | 52.04 | 86.33 | consensus27 |
| Nephritis | Glucocorticoids | 35.92 | proteinuria | 1.49 | 7 | 52.04 | 89.44 | consensus27 |
| Vasculitis | hormone | 0.88 | Intravenous ultrasound | 41.63 | 10 | 74.34 | 116.84 | Byram K,et al30 |

Abbreviations: AE:adverse events; NSAIDS: Nonsteroidal Anti-inflammatory Drugs; CRP: C-reaction protein; CT: Computed Tomography; MRI: Magnetic Resonance Imaging.

aThe majority of costs inputs regarding adverse events were gathered in strict adherence to the Chinese expert consensus, with relevant references provided in Table S7. In instances where certain adverse events lack special guidance from the Consensus, we sought guidance from one of our authors, Li Feng, an experienced expert with a decade of specialized knowledge within the oncology department of a Class tertiary comprehensive hospital in China.

bAs per the opinion of local oncologists, alopecia and fatigue were deemed not to require any additional treatment.

cBased on the opinion of local oncologists, it has been determined that these AEs do not warrant further examination. Instead, they require corresponding medical treatment and may result in an extended duration of hospitalization.

**Table S8. Proportion, costs and disutility of grade IIIIV AEs considered in the model**

| **AEs** | **Proportion** | | **Disutilities Decrementa** | **Cost per event($)b** |
| --- | --- | --- | --- | --- |
| **Pembrolizumab Plus Chemotherpy** | **Placebo Plus Chemotherpy** |
| Anemia | 15.8% | 20.7% | 0.01033 | 49.34 |
| Alopecia | 0.4% | 1.1% | 0.03325 | 0.00 |
| Neutropenia | 23.0% | 24.6% | 0.00413 | 93.48 |
| Nausea | 1.4% | 1.1% | 0.00046 | 54.61 |
| Diarrhea | 4.3% | 2.5% | 0.00180 | 45.07 |
| Thrombocytopenia | 8.3% | 6.8% | 0.00757 | 266.13 |
| Decreased appetite | 2.5% | 1.4% | 0.00282 | 42.64 |
| Arthralgia | 1.8% | 0.7% | 0.00076 | 112.10 |
| Constipation | 0.7% | 1.1% | 0.00176 | 72.13 |
| Fatigue | 4.7% | 4.3% | 0.00101 | 0.00 |
| Asthenia | 2.2% | 4.3% | 0.00101 | 106.75 |
| Peripheral neuropathy | 1.1% | 0.7% | 0.01191 | 53.30 |
| Rash | 0.7% | 0.0% | 0.00174 | 47.76 |
| Pruritus | 0.4% | 0.4% | 0.00062 | 66.76 |
| Vomiting | 0.4% | 2.1% | 0.00046 | 54.61 |
| Cough | 0.7% | 1.1% | 0.00038 | 162.12 |
| Pyrexia | 0.7% | 1.8% | 0.00038 | 88.08 |
| Dyspnea | 1.4% | 1.4% | 0.00055 | 209.57 |
| Hypothyroidism | 0.4% | 0.0% | 0.00794 | 100.33 |
| Pneumonitis | 3.3% | 1.1% | 0.01127 | 246.45 |
| Hyperthyroidism | 0.4% | 0.0% | 0.00794 | 86.35 |
| Infusion reactions | 1.8% | 0.4% | 0.00505 | 53.82 |
| Colitis | 2.5% | 1.1% | 0.01616 | 184.06 |
| Hepatitis | 2.2% | 0.0% | 0.00862 | 119.14 |
| Severe skin reactions | 1.4% | 0.4% | 0.00534 | 70.76 |
| Hypophysitis | 0.8% | 0.0% | 0.00529 | 265.51 |
| Thyroiditis | 0.4% | 0.0% | 0.00794 | 86.35 |
| Nephritis | 0.7% | 0.7% | 0.00709 | 89.45 |
| Vasculitis | 0.4% | 0.0% | 0.00706 | 116.84 |
| **Estimated AEs disutility and cost** | | | | |
| AEs disutility for pembrolizumab plus chemotherapy | | | 0.00503 |  |
| AEs disutility for placebo plus chemotherapy | | | 0.00472 |  |
| AEs cost for pembrolizumab plus chemotherpy , $ | | | | 87.7 |
| AEs cost for placebo plus chemotherpy, $ | | | | 73.7 |

Abbreviations: AEs, adverse events.

aSource from Table S6.

bSource from Table S7.

**Table S9. Model inputs**

| **Parameters** | **Baseline Value** | **Range** | **Distribution** | | **Source** |
| --- | --- | --- | --- | --- | --- |
| Survival | | | | | |
| OS of pembro+chemo in entire trial population | Log-logistic θ=0.01199;κ=1.36517 | Fixed in DSA | Fixed in PSA | | Parametric survival analyses of KEYNOTE-407 data |
| OS of Placebo+Chemo in entire trial population | Log-logistic θ=0.01760;κ=1.41160 | Fixed in DSA | Fixed in PSA | |
| PFS of Pembro+Chemo in entire trial population | Log-logistic θ=0.04171;κ=1.27109 | Fixed in DSA | Fixed in PSA | |
| PFS of Placebo+Chemo in entire trial population | Log-logistic θ=0.04396;κ=1.57326 | Fixed in DSA | Fixed in PSA | |
| OS of Pembro+Chemo in the PD-L1 TPS≥50% subgroup | Log-logistic θ=0.02143;κ=1.15951 | Fixed in DSA | Fixed in PSA | |
| OS of Placebo+Chemo in the PD-L1 TPS≥50% subgroup | Log-logistic θ=0.03336;κ=1.18900 | Fixed in DSA | Fixed in PSA | |
| PFS of Pembro+Chemo in the PD-L1 TPS≥50% subgroup | Log-logistic θ=0.04324;κ=1.19222 | Fixed in DSA | Fixed in PSA | |
| PFS of Placebo+Chemo in the PD-L1 TPS≥50% subgroup | Log-logistic θ=0.08109;κ=1.46497 | Fixed in DSA | Fixed in PSA | |
| OS of Pembro+Chemo in the PD-L1 TPS 1%-49% subgroup | Log-logistic θ=0.01109;κ=1.36314 | Fixed in DSA | Fixed in PSA | |
| OS of Placebo+Chemo in the PD-L1 TPS 1%-49%subgroup | Log-logistic θ=0.01294;κ=1.52902 | Fixed in DSA | Fixed in PSA | |
| PFS of Pembro+Chemo in the PD-L1 TPS 1%-49% subgroup | Log-logistic θ=0.04508;κ=1.17614 | Fixed in DSA | Fixed in PSA | |
| PFS of Placebo+Chemo in the PD-L1 TPS 1%-49% subgroup | Log-logistic θ=0.07931;κ=1.48643 | Fixed in DSA | Fixed in PSA | |
| OS of Pembro+Chemo in the PD-L1 TPS ＜ 1% subgroup | Log-logistic θ=0.00626;κ=1.63459 | Fixed in DSA | Fixed in PSA | |
| OS of Placebo+Chemo in the PD-L1 TPS ＜ 1% subgroup | Log-logistic θ=0.01439;κ=1.49409 | Fixed in DSA | Fixed in PSA | |
| PFS of Pembro+Chemo in the PD-L1 TPS ＜ 1% subgroup | Log-logistic θ=0.02440;κ=1.55660 | Fixed in DSA | Fixed in PSA | |
| PFS of Placebo+Chemo in the PD-L1 TPS ＜ 1% subgroup | Log-logistic θ=0.04084;κ=1.55703 | Fixed in DSA | Fixed in PSA | |
| Costs (US$) | | | | | |
| Pembrolizumab price per mg | 26.64 | 19.98-33.30 | Gamma | National Health Industry Data Platform | |
| Paclitaxel price per mg | 0.25 | 0.19-0.31 | Gamma |
| Nabpaclitaxel price per mg | 0.22 | 0.17-0.28 | Gamma |
| Carboplatin price per mg | 0.08 | 0.06-0.10 | Gamma |
| Dexamethasone price per cycle | 0.30 | 0.23-0.38 | Gamma |
| Diphenhydramine price per cycle | 1.11 | 0.83-1.39 | Gamma |
| Cimetidine price per cycle | 0.22 | 0.17-0.28 | Gamma |
| Subsequent therapy cost of pembro+chemo (consecutive cycles) | 720.64 | 540.48-900.80 | Gamma | Supplementary Table S3 | |
| Subsequent therapy cost of placebo+chemo (consecutive cycles) | 2871.01 | 2153.26-3588.77 | Gamma |
| Subsequent therapy cost of pembro+chemo (one-off) | 65.15 | 48.86-81.43 | Gamma |
| Subsequent therapy cost of placebo+chemo (one-off) | 23.61 | 17.71-29.52 | Gamma |
| Routine follow-up cost per cycle | 55.60 | 41.70-69.50 | Gamma | Liu Q, et al31 | |
| BSC cost per cycle | 337.50 | 253.13-421.88 | Gamma |
| End-of-life cost per cycle | 2627.80 | 1970.85-3284.75 | Gamma |
| AEs management cost of pembro+chemo | 88.15 | 66.12-110.19 | Gamma | Supplementary Table S8 | |
| AEs management cost of placebo+chemo | 73.67 | 55.25-92.09 | Gamma |
| Utilities | | | | | |
| PFD health state | 0.86 | 0.718-0.994 | Beta | Shen Y, et al32 | |
| PD health state | 0.77 | 0.595-0.941 | Beta |
| AEs disutility of pembro+chemo | 0.00503 | 0.00378-0.00629 | Beta | Supplementary Table S8 | |
| AEs disutility for placebo+chemo | 0.00472 | 0.00354-0.00590 | Beta |
| Other |  |  |  |  | |
| Discount rate (%) | 5.00 | 0-8 | Fixed in PSA | Sanders GD, et al33 | |
| Body surface area(m2) | 1.72 | 1.29-2.15 | Normal | Liu Q, et al31 | |
| Creatinine clearance rate (ml/min) | 70.00 | 52.50-87.50 | Normal |

Abbreviations: DSA, deterministic sensitivity analyses; PSA, probabilistic sensitivity analysis; OS, overall survival; PFS, progression-free survival; PD-L1, programmed death ligand 1;TPS, tumor proportion score; BSC, best supprotive treatment; AEs, adverse events; PFD, progression-free disease; PD, progressed disease; Pembro+Chemo pembrolizumab plus chemotherapy; Placebo+Chemo, placebo plus chemotherapy.

**Figure S1. KM curves and modeled curves for the entire trial population**

**
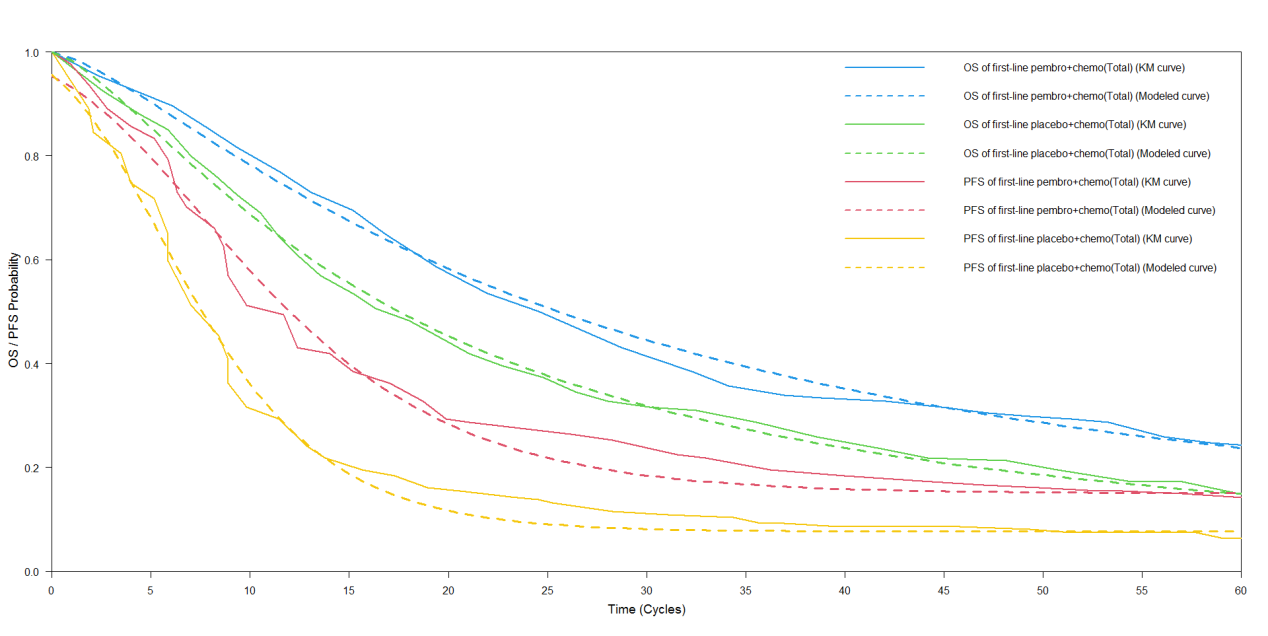
**

Abbreviations: OS, overall survival; PFS, progression-free survival; pembro+chemo pembrolizumab plus chemotherapy; placebo+chemo, placebo plus chemotherapy.

**Figure S2. KM curves and modeled curves for the PD-L1 TPS ≥50% subgroup**


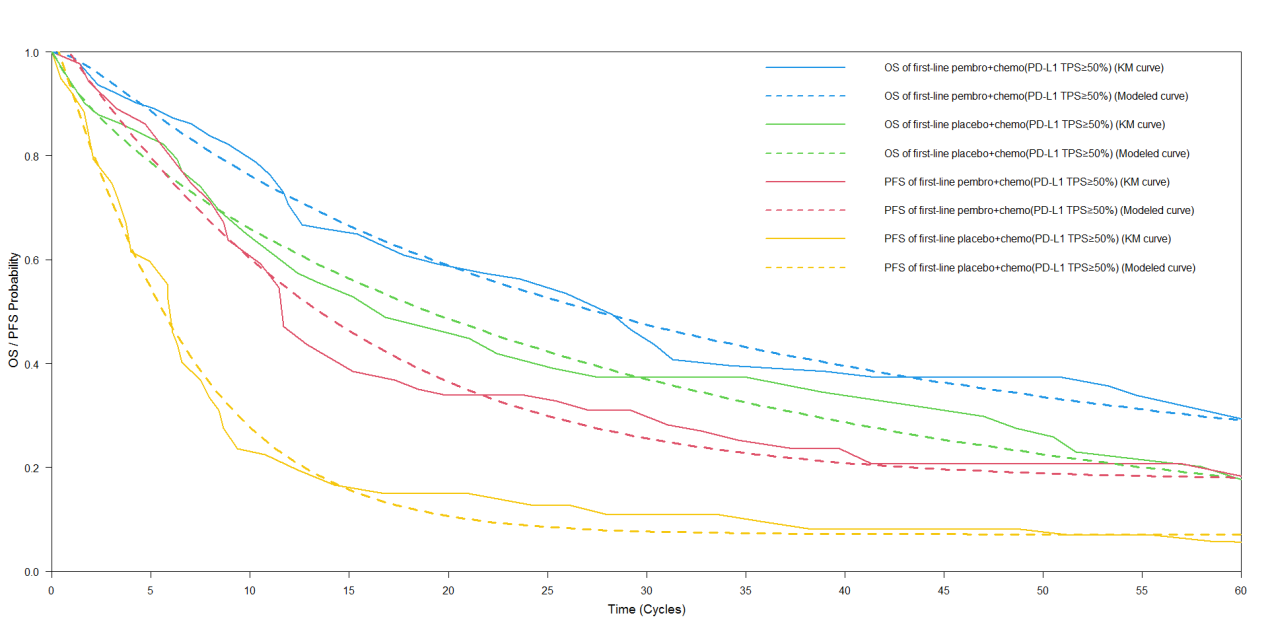


Abbreviations: OS, overall survival; PFS, progression-free survival; PD-L1, programmed death ligand 1;TPS, tumor proportion score; pembro+chemo pembrolizumab plus chemotherapy; placebo+chemo, placebo plus chemotherapy.

**Figure S3. KM curves and modeled curves for the PD-L1 TPS 1%~49% subgroup**

**
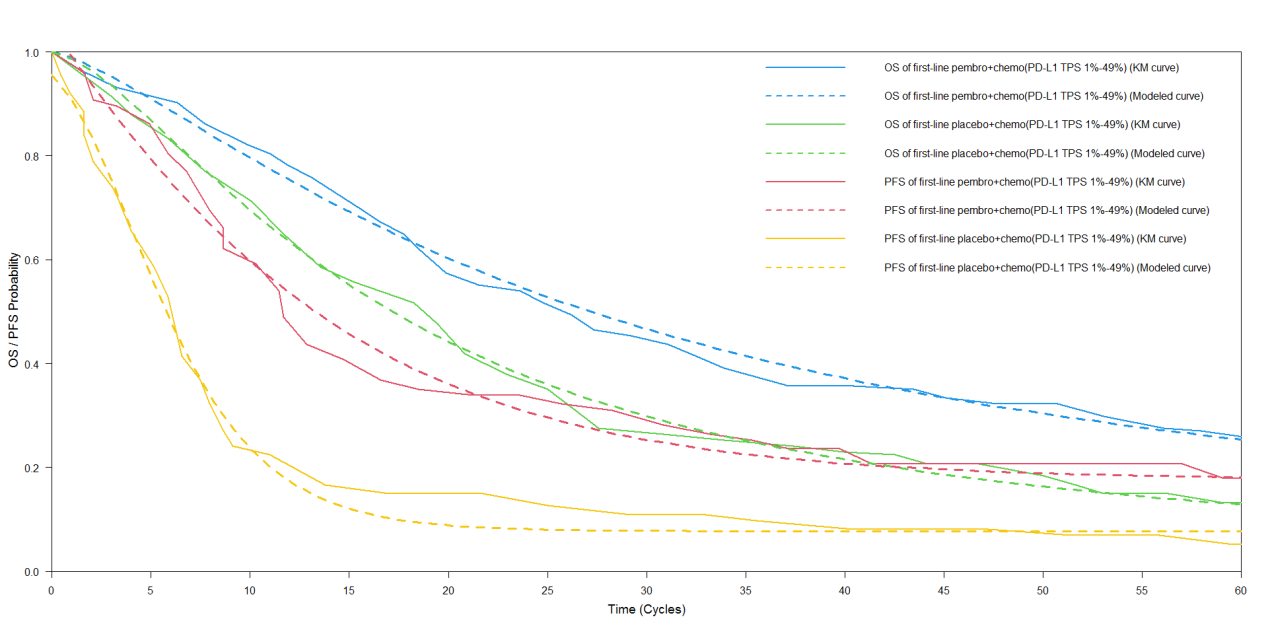
**

Abbreviations: OS, overall survival; PFS, progression-free survival; PD-L1, programmed death ligand 1;TPS, tumor proportion score, pembro+chemo pembrolizumab plus chemotherapy; placebo+chemo, placebo plus chemotherapy.

**Figure S4. KM curves and modeled curves for the PD-L1 TPS＜1% subgroup**

**
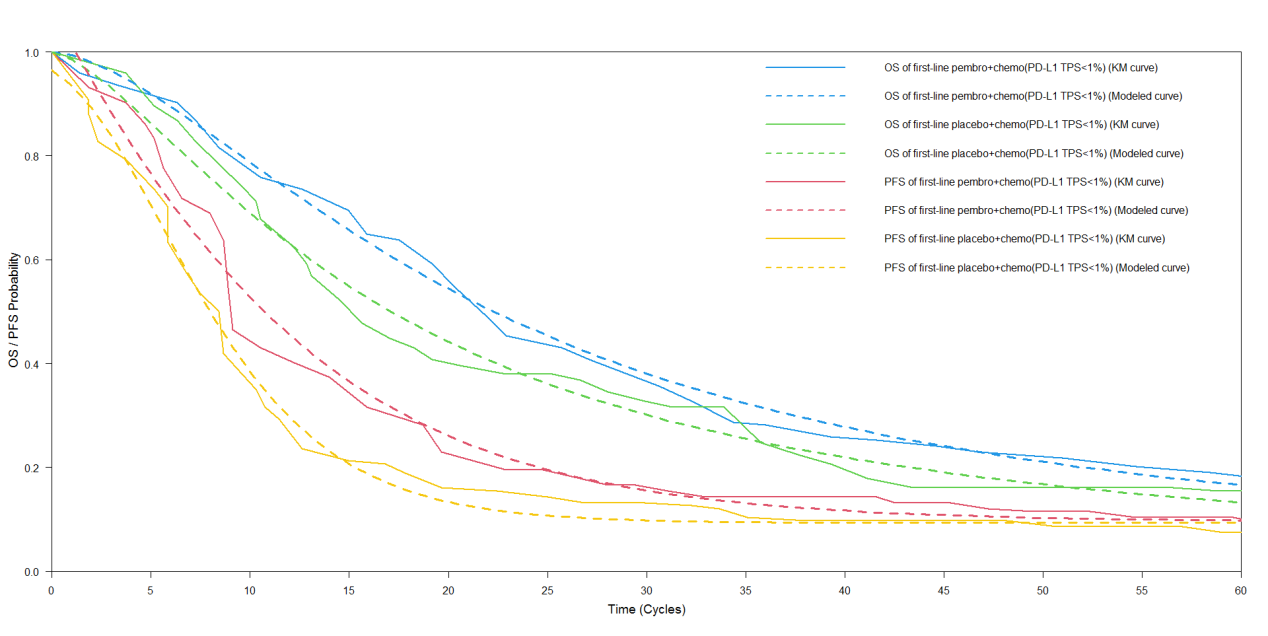
**

Abbreviations: OS, overall survival; PFS, progression-free survival; PD-L1, programmed death ligand 1;TPS, tumor proportion score; pembro+chemo pembrolizumab plus chemotherapy; placebo+chemo, placebo plus chemotherapy.

**Figure S5. Deterministic sensitivity analysis results for first-line pembro+chemo vs placebo+chemo in the PD-L1 TPS ≥50% subgroup**

**
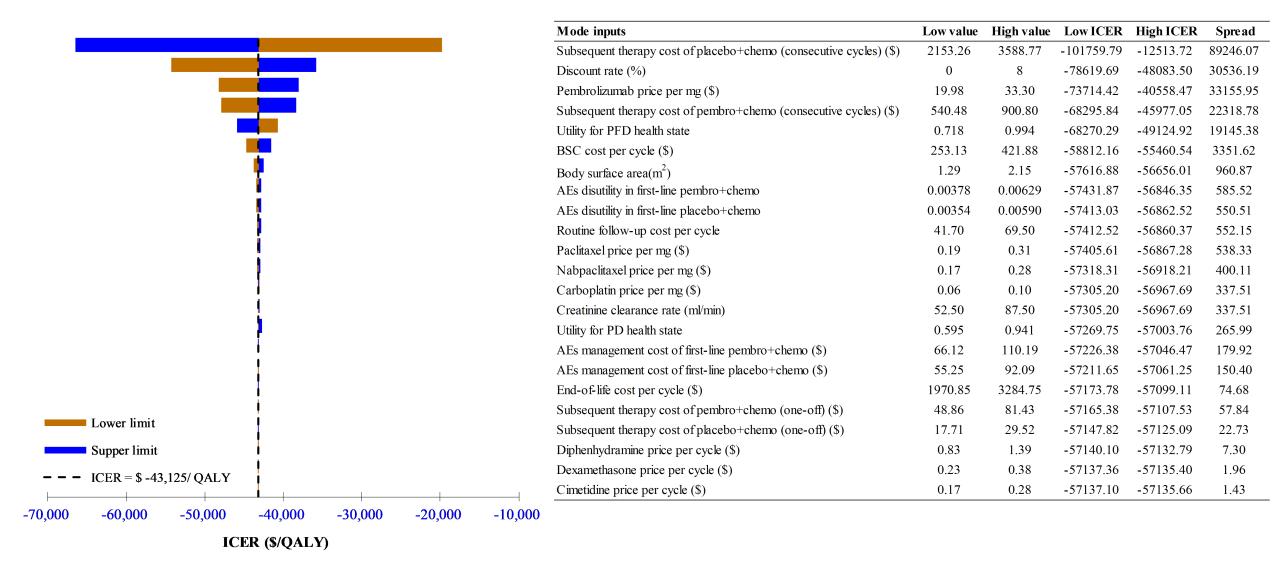
**

Abbreviations: ICER, incremental cost-effectiveness ratio; QALY, quality-adjusted life-year; PFD, progression-free disease; BSC, best supportive treatment; AEs, adverse events; PD, progressed disease; pembro+chemo pembrolizumab plus chemotherapy; placebo+chemo, placebo plus chemotherapy.

**Figure S6. Deterministic sensitivity analysis results for first-line pembro+chemo vs placebo+chemo in the PD-L1 1%~49% subgroup**

**
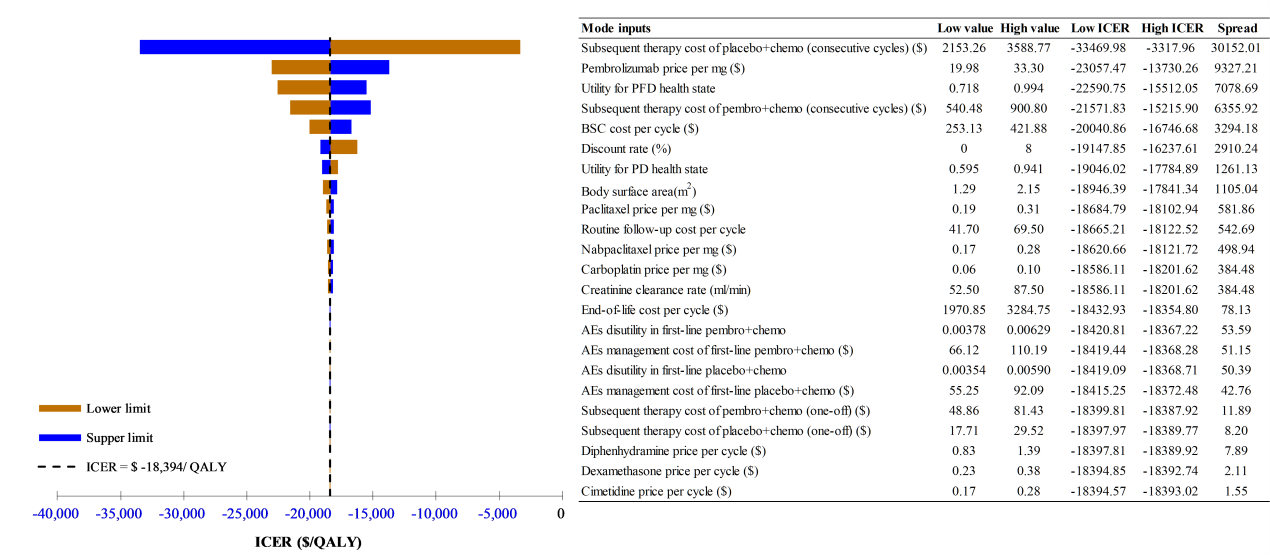
**

Abbreviations: ICER, incremental cost-effectiveness ratio; QALY, quality-adjusted life-year; PFD, progression-free disease; BSC, best supprotive treatment; PD, progressed disease; AEs, adverse events; pembro+chemo pembrolizumab plus chemotherapy; placebo+chemo, placebo plus chemotherapy.

**Figure S7. Deterministic sensitivity analysis results for first-line pembro+chemo vs placebo+chemo in the PD-L1 TPS＜1% subgroup**

**
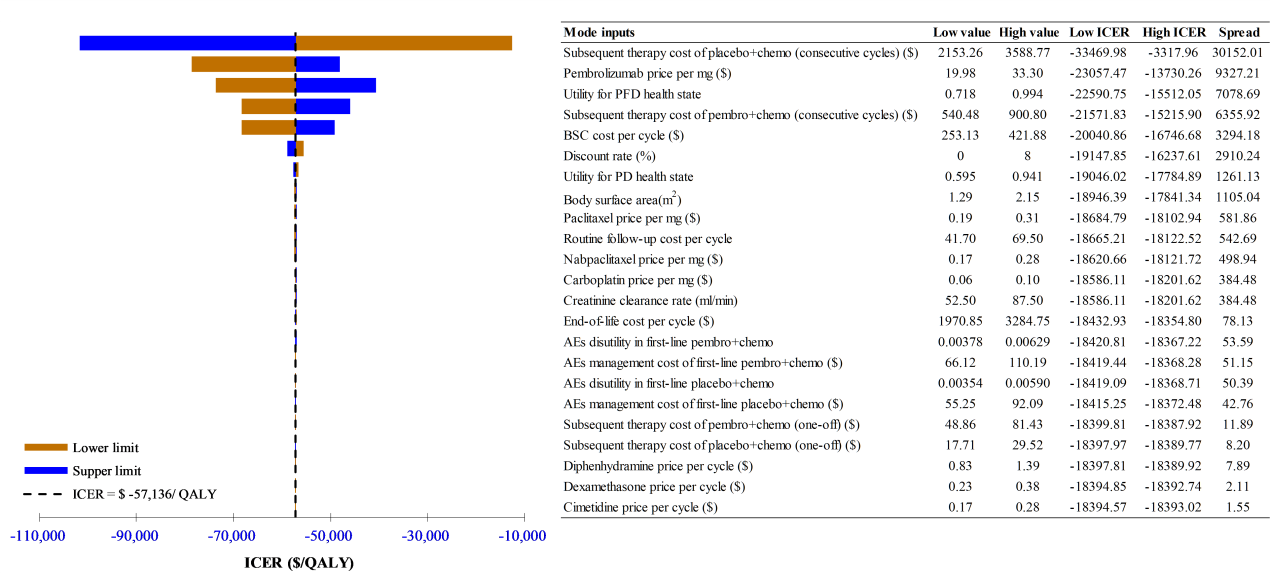
**

Abbreviations: ICER, incremental cost-effectiveness ratio; QALY, quality-adjusted life-year; PFD, progression-free disease; BSC, best supprotive treatment; PD, progressed disease; AEs, adverse events; pembro+chemo pembrolizumab plus chemotherapy; placebo+chemo, placebo plus chemotherapy.

**Figure S8. Cost-effectiveness acceptability curves for first-line pembro+chemo vs placebo+chemo**

**
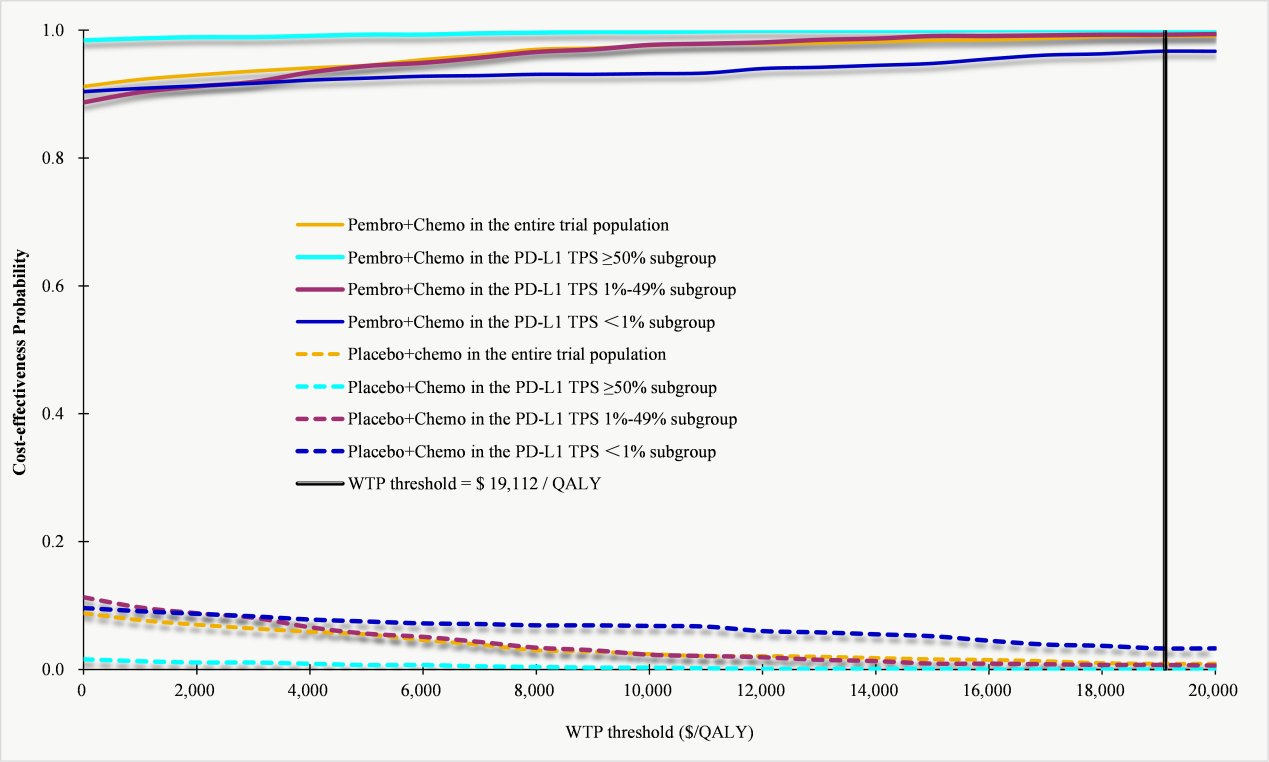
**

Abbreviations: PD-L1, programmed death ligand 1;TPS, tumor proportion score; Pembro+Chemo pembrolizumab plus chemotherapy; Placebo+Phemo, placebo plus chemotherapy.

**References**

1. Novello S, Kowalski DM, Luft A, Gümüş M, et al. Pembrolizumab Plus Chemotherapy in Squamous Non-Small-Cell Lung Cancer: 5-Year Update of the Phase III KEYNOTE-407 Study. J Clin Oncol. 2023;41(11):1999-2006.

2. National Health Industry Data Platform. Bid winning information of drugs. Available online at: https://www.yaozh.com/ . Accessed 25 April 2023.

3. Pharmacy Checker.com. Available online at: https: //www. pharmacychecker.com/ cyramza/? src=drug-suggest#!. Accessed 25 April 2023.

4. Chinese society of clinical oncology. Guidelines of chinese society of clinical oncology(CSCO) non-small cell lung cancer[M]. Beijing. People’s medical publishing house co.,LTD. 2022.

5. Institute for clinical and economic review. Treatment options for advanced non-small cell lung cancer:effectiveness, value and value-based price benchmarks. Final evidence report and meeting summary, 2016,11:1.

6. Delanoy N, Michot JM, Comont T, et al(2019). Haematological immune-related adverse events induced by anti-PD-1 or anti-PD-L1 immunotherapy: a descriptive observational study. Lancet Haematol. 2019;6(1):e48-e57.

7. Antoury L, Maloney NJ, Bach DQ, Goh C, Cheng K. Alopecia areata as an immune-related adverse event of immune checkpoint inhibitors: A review. 2020;Dermatol Ther. 33(6):e14171.

8. Msaouel P, Oromendia C, Siefker-Radtke AO, et al. Evaluation of Technology-Enabled Monitoring of Patient-Reported Outcomes to Detect and Treat Toxic Effects Linked to Immune Checkpoint Inhibitors. JAMA Netw Open. 2021;4(8):e2122998.

9. Borghaei H, Paz-Ares L, Horn L, et al. Nivolumab versus Docetaxel in Advanced Nonsquamous Non-Small-Cell Lung Cancer. N Engl J Med. 2015;373(17):1627-39.

10. Diamanti L, Picca A, Bini P, et al. Characterization and management of neurological adverse events during immune-checkpoint inhibitors treatment: an Italian multicentric experience. Neurol Sci. 2022;43(3):2031-2041.

11. Ye qiang. A retrospective study of immue checkpoint inhibitor related thyroid adverse events.Guangzhou Medical University,2022.

12. Ma liyun,Yan chunliang,Zhao qiuhong, Ren xiyan, Zheng qingyue. Clinical analysis of pneumonitis caused by immune checkpoint inhibitors in treatment of non-small cell lung cancer.Oncology progress, 2021;19(08):810-813.

13. Soularue E, Lepage P, Colombel JF, et al. Enterocolitis due to immune checkpoint inhibitors: a systematic review. Gut. 2018;67(11):2056-2067.

14. Horn L, Spigel DR, Vokes EE, et al. Nivolumab Versus Docetaxel in Previously Treated Patients With Advanced Non-Small-Cell Lung Cancer: Two-Year Outcomes From Two Randomized, Open-Label, Phase III Trials (CheckMate 017 and CheckMate 057). 2017;J Clin Oncol. 35(35):3924-3933.

15. Martins F, Sofiya L, Sykiotis GP, et al(. Adverse effects of immune-checkpoint inhibitors: epidemiology, management and surveillance. Nat Rev Clin Oncol. 2019;16(9):563-580.

16. Brahmer J, Reckamp KL, Baas P, et al(2015). Nivolumab versus Docetaxel in Advanced Squamous-Cell Non-Small-Cell Lung Cancer. N Engl J Med. 2015;373(2):123-35.

17. Qiu xuejia, Ren bingnan, Lian yufei, Fang lingzhi. Literature analysis of programmed death 1 /programmed death ligand 1 inhibitors-induced rare adverse drug reaction skin vasculitis. Chinese Journal of New Drugs, 2021;30(20):1915-1920.

18. The society of chemotherapy, Chinese Anti-Cancer Association; Committee of neoplastic supportive-care (CONS), China Anti-Cancer Association. A consensus on the clinical diagnosis, treatment, and prevention of cancer- and chemotherapy-related anemia in China(2019 edition) Chin J Clin Oncol, 2019;46(17):869-875.

19. The society of chemotherapy, Chinese Anti-Cancer Association; Committee of neoplastic supportive-care (CONS), China Anti-Cancer Association. Consensus on the clinical diagnosis, treatment, and prevention of chemotherapy- induced neutropenia in China (2019 edition). Chin J Clin Oncol, 2019;46(17):876-882.

20. The society of chemotherapy, Chinese Anti-Cancer Association; Committee of neoplastic supportive-care (CONS), China Anti-Cancer Association. Chinese experts’ consensus on the prevention and the treatment of nausea and vomiting related to anti-cancer drug treatment(2022version). Natl Med J China, 2022;102(39):3080-3094.

21. Oncology Support Rehabilitation Therapy Group of Oncology Branch of Chinese Medical Association. Consensus on clinical management of cancer therapy-related thrombocytopenia. Tumor, 2021;41 (12): 812-827.

22. Chinese Society of Nutritional Oncology, Medical Nutrition Industry Branch of National Association of Health Industry and Enterprise Management, Tumor Nutrition and Therapy Branch of Zhejiang Medical Association. Expert consensus on the nutritional diagnosis and treatment of appetite loss in cancer patients. Electron J Metab Nutr Cancer, 2022;9(3):312-319.

23. Digestive Diseases Professional Committee of Chinese Association of Integrative Medicine. Consensus opinion on the diagnosis and treatment of functional constipation in integrated traditional Chinese and Western medicine(2017 version) Chin J Integr Trad West Med Dig, 2018;26(1):18-26.

24. Chinese Society for Pain of Integrated Traditional Chinese and Western Medicine, Integrated Traditional Chinese and Western Medicine Professional Committee of China Anti-Cancer Association, China Association for the Promotion of Traditional Chinese Medicine Research. Expert consensus on the diagnosis and treatment of peripheral neuropathic pain caused by chemotherapy in traditional Chinese and Western medicine.Chin J Cancer Prev Treat, 2021;28(23):1761-1767+1779.

25. Dermatology Branch of China Association of Chinese Medicine. Expert consensus on the treatment of pruritus in traditional Chinese medicine. Chin J Dermato Venerol Integ Trad W Med, 2017;16(02):189-190.

26. Cancer Rehabilitation and Palliative Treatment Professional Committee of China Anti-Cancer Association. Chinese expert consensus on the diagnosis and treatment of lung cancer-related cough, Nat Med J China, 2021;101(35): 2751-2759.

27. Onco-endocrinology Committee of Chinese Anti-Cancer Association, Onco-endocrinology Committee of Chongqing Association of Biomedical Technology，Onco-endocrinology Committee of Chongqing Association of Integraive Medicine. Chinese expert consensus on immune checkpoint inhibitors induced emergency management of endocrine adverse reactions. Journal of Chongqing Medical University, 2023;48(01):1-12.

28. Lung Cancer Group of Chinese Thoracic Society. Expert consensus on the diagnosis and treatment of immune checkpoint inhibitor-associated pneumonia.Chin J Tubere Respir Dis， 2019;42(11):820-825.

29. Chinese Association of Integrative Medicine. Experts consensus on diagnosis and treatment of ulcerative colitis by integrative medicine. Chin J Integr Tradit West Med, 2023;43(1):5-11.

30. Byram K, Hajj-Ali RA, Calabrese L. CNS Vasculitis: an Approach to Differential Diagnosis and Management. Curr Rheumatol Rep. 2018;20(7):37.

31. Qiao L, Zhou Z, Zeng X, et al. Cost-Effectiveness of Domestic PD-1 Inhibitor Camrelizumab Combined With Chemotherapy in the First-Line Treatment of Advanced Nonsquamous Non-Small-Cell Lung Cancer in China. Front Pharmacol. 202;12:728440.

32. Shen Y, Wu B, Wang X, Zhu J. Health state utilities in patients with advanced non-small-cell lung cancer in China. J Comp Ef Res. 2018;7:443-452.

33. Sanders GD, Neumann PJ, Basu A, et al. Recommendations for Conduct, Methodological Practices, and Reporting of Cost-effectiveness Analyses: Second Panel on Cost-Effectiveness in Health and Medicine. JAMA. 2016;316(10):1093-103.
